# Supplementary material for: Impact of liver fibrosis and nodules formation on hemodynamics in young adults after total cavopulmonary connection. A magnetic resonance study
Source: PubMed Central journal article supplement (PMC9558211; doi:10.3389/fcvm.2022.986653), 2022-09-29
Supplement: Data_Sheet_1.pdf [file Data_Sheet_1.pdf]

Supplementary Table 1. Correlations between MRI variables and ELF test

| MRI variables                                     | Measure             | PIIINP |         | TIMP-1 |         | HA     |         | ELF score |         |
|---------------------------------------------------|---------------------|--------|---------|--------|---------|--------|---------|-----------|---------|
|                                                   |                     | r      | p value | r      | p value | r      | p value | r         | p value |
| Heart rate (beats/min)                            | 71 ± 13             | -0.150 | 0.361   | 0.249  | 0.127   | -0.133 | 0.421   | -0.166    | 0.314   |
| End-diastolic volume (mL/m <sup>2</sup> )         | 92.3 (77.5 - 105.6) | 0.328  | 0.042   | -0.095 | 0.565   | 0.070  | 0.672   | 0.207     | 0.206   |
| End-systolic volume (mL/m <sup>2</sup> )          | 41.5 (34.1 - 54.5)  | 0.213  | 0.192   | 0.050  | 0.764   | 0.120  | 0.466   | 0.204     | 0.213   |
| Stroke volume (mL/m <sup>2</sup> )                | 48.5 ± 8.7          | 0.341  | 0.034   | -0.108 | 0.511   | -0.045 | 0.785   | 0.171     | 0.297   |
| Cardiac index (L/min/m <sup>2</sup> )             | 3.3 (3.0 – 3.7)     | 0.198  | 0.227   | 0.065  | 0.692   | -0.183 | 0.265   | -0.021    | 0.898   |
| Ejection fraction                                 | 0.54 (0.48 – 0.59)  | -0.008 | 0.964   | -0.099 | 0.548   | -0.005 | 0.975   | -0.050    | 0.762   |
| End-diastolic myocardial mass (g/m <sup>2</sup> ) | 50.6 ± 15.9         | 0.216  | 0.198   | -0.124 | 0.466   | 0.074  | 0.662   | 0.209     | 0.215   |
| AO flow (L/min/m <sup>2</sup> )                   | 2.9 ± 0.4           | 0.196  | 0.233   | 0.146  | 0.374   | -0.118 | 0.475   | 0.068     | 0.681   |
| Systemic venous flow (L/min/m <sup>2</sup> )      | 2.3 ± 0.4           | 0.445  | 0.005   | 0.282  | 0.083   | -0.085 | 0.606   | 0.253     | 0.119   |
| IVC flow (L/min/m <sup>2</sup> )                  | 1.6 ± 0.3           | 0.465  | 0.003   | 0.278  | 0.087   | -0.073 | 0.658   | 0.248     | 0.127   |
| SVC flow (L/min/m <sup>2</sup> )                  | 0.7 ± 0.1           | 0.219  | 0.180   | 0.176  | 0.284   | -0.078 | 0.638   | 0.162     | 0.325   |
| IVC / SVC flow                                    | 2.4 ± 0.5           | 0.192  | 0.241   | 0.065  | 0.694   | 0.017  | 0.919   | 0.062     | 0.710   |
| Pulmonary artery flow (L/min/m <sup>2</sup> )     | 2.2 (1.9 - 2.4)     | 0.179  | 0.277   | 0.202  | 0.217   | 0.069  | 0.674   | 0.120     | 0.466   |
| Pulmonary venous flow (L/min/m <sup>2</sup> )     | 2.9 ± 0.5           | 0.108  | 0.513   | 0.276  | 0.089   | -0.077 | 0.640   | 0.056     | 0.735   |
| Qcoll-pulm flow (L/min/m <sup>2</sup> )           | 0.56 ± 0.24         | -0.101 | 0.540   | 0.033  | 0.841   | -0.040 | 0.808   | -0.078    | 0.637   |
| Qcoll-pulm/AO flow x 100 (%)                      | 19 ± 7              | -0.205 | 0.211   | -0.014 | 0.933   | 0.026  | 0.874   | -0.094    | 0.569   |
| McGoon index                                      | 2.5 ± 0.7           | -0.096 | 0.563   | 0.004  | 0.981   | -0.005 | 0.976   | -0.087    | 0.598   |
| Nakata index (mm <sup>2</sup> /m <sup>2</sup> )   | 245 ± 56            | -0.077 | 0.641   | 0.295  | 0.068   | 0.061  | 0.712   | 0.043     | 0.793   |

Data are represented as mean ± SD or median (IQR) and Pearson's or Spearman's coefficients as appropriate. AO, aorta; HA, hyaluronic acid; IVC, inferior vena cava; LPA, left pulmonary artery; PIIINP, procollagen III amino-terminal peptide; Qcoll-pulm, aortopulmonary collateral flow; RPA, right pulmonary artery; RPV, right pulmonary vein; SVC, superior vena cava; TIMP-1, inhibitors of matrixmetaloproteinases
